# Supplementary material
Source: Elsevier journal article supplement (https://www.sciencedirect.com/science/article/pii/S2238785417301485)
Supplement: mmc1 [file S2238785417301485:mmc1.xlsx]

## Sheet: ورقة1
0	0	0	0	0	0	0	0
2.499	0.09	2.499	0.12	2.499	0.133	1.4642	0.22
4.999	0.2	4.999	0.24	4.89697	0.33	2.9285	0.51
7.499	0.31	7.499	0.36	7.43	0.41	4.411	0.77
8.7499	0.42	8.7499	0.51	9	0.55	5	0.82
9.998	0.46	9.998	0.55	11	0.62	7	1.1
11.3	0.49	12	0.61	13	0.81	12	1.66
11.5	0.52	13	0.66	16	1.52	13	1.9
13	0.57	15	1.25	19	2.1	15	2
19	1.32	18	1.73	21.68	3.11	17.84	3
22	1.88	22	2.75
27	2.99	25.7	3.76
28.3	3.71
