# Supplementary material
Source: Elsevier journal article supplement (https://www.sciencedirect.com/science/article/pii/S2238785417301485)
Supplement: mmc2 [file S2238785417301485:mmc2.xlsx]

## Sheet: ورقة1
4.1	0	17.8	0
8.08	0.49	21.7	0.49
9.75	1	25.7	1
11.25	2	28.3	2
