# Supplementary material
Source: Elsevier journal article supplement (https://www.sciencedirect.com/science/article/pii/S2238785417301485)
Supplement: mmc3 [file S2238785417301485:mmc3.xlsx]

## Sheet: ورقة1
0	0	0	0	0	0	0	0
2.5	0.26	2.494	0.31	2.44825	0.28	1.4643	0.24
5	0.34	4.998	0.38	4.8965	0.36	2.9286	0.38
8.75	0.38	9.7	0.51	8.08	0.41	4.1	0.48
10	0.42	12	0.55	11	0.55	6	0.72
11.25	0.44	13	0.58	14	0.76	9	1
19	0.94	16	0.72	16	0.87	11	1.37
21	1.05	18	1	18	1.52	13	1.5
23	1.45	20	1.41	20	2.1	15	1.65
25	1.71	23	1.75	21.68	2.47	17.84	2.54
28.3	2.02	25.7	2.1
